# Supplementary material for: A Multiplexed Urinary Biomarker Panel Has Potential for Alzheimer’s Disease Diagnosis Using Targeted Proteomics and Machine Learning
Source: MDPI journal article supplement (doi:10.3390/ijms241813758), 2023-09-06
Supplement: s1 [file s1]

**Table S1.** Significantly different proteins in the comparison of urine protein expression between AD and healthy controls. *The table shows the gene name, protein name, accession number and the p-value from Student's t-test between AD and controls.*

| Gene     | Protein name                                                      | Accession | p-value |
|----------|-------------------------------------------------------------------|-----------|---------|
| ACTN4    | Alpha-actinin-4                                                   | O43707    | 4.6E-02 |
| ANXA3    | Annexin A3                                                        | P12429    | 5.0E-02 |
| APOA4    | Apolipoprotein A-IV                                               | P06727    | 1.3E-02 |
| ATP6V1A  | V-type proton ATPase catalytic subunit A                          | P38606    | 4.8E-02 |
| B2M      | Beta-2-microglobulin                                              | P61769    | 2.5E-02 |
| BCAS1    | Breast carcinoma-amplified sequence 1                             | O75363    | 2.3E-02 |
| BTD      | Biotinidase                                                       | P43251    | 4.8E-02 |
| BTN2A1   | Butyrophilin subfamily 2 member A1                                | Q7KYR7    | 1.8E-02 |
| CCDC126  | Coiled-coil domain-containing protein 126                         | Q96EE4    | 8.8E-03 |
| CD5L     | CD5 antigen-like                                                  | O43866    | 4.5E-02 |
| CEP162   | Centrosomal protein of 162 kDa                                    | Q5TB80    | 5.0E-02 |
| CILP     | Cartilage intermediate layer protein 1                            | O75339    | 1.2E-02 |
| CP       | Ceruloplasmin                                                     | P00450    | 2.8E-02 |
| CYR61    | CCN family member 1                                               | O00622    | 4.1E-02 |
| DSP      | Desmoplakin                                                       | P15924    | 3.1E-02 |
| ERVK-9   | Endogenous retrovirus group K member 9 Rec protein                | P63128    | 2.6E-02 |
| FRMD4B   | FERM domain-containing protein 4B                                 | Q9Y2L6    | 1.5E-02 |
| GPI      | Glucose-6-phosphate isomerase                                     | P06744    | 4.1E-02 |
| HPX      | Hemopexin                                                         | P02790    | 2.9E-02 |
| KIF13B   | Kinesin-like protein KIF13B                                       | Q9NQT8    | 3.8E-02 |
| LAIR1    | Leukocyte-associated immunoglobulin-like receptor 1               | Q6GTX8    | 5.0E-02 |
| LASP1    | LIM and SH3 domain protein 1                                      | Q14847    | 3.4E-02 |
| MAGIX    | PDZ domain-containing protein MAGIX                               | Q9H6Y5    | 3.0E-02 |
| METTL8   | tRNA N                                                            | Q9H825    | 1.7E-02 |
| MIEN1    | Migration and invasion enhancer 1                                 | Q9BRT3    | 4.2E-02 |
| NAPSA    | Napsin-A                                                          | O96009    | 2.2E-02 |
| OLR1     | Oxidized low-density lipoprotein receptor 1                       | P78380    | 2.8E-02 |
| PHF6     | PHD finger protein 6                                              | Q8IWS0    | 4.5E-02 |
| PLD3     | 5'-3' exonuclease PLD3                                            | Q8IV08    | 1.5E-02 |
| PLIN3    | Perilipin-3                                                       | O60664    | 1.1E-02 |
| PURG     | Purine-rich element-binding protein gamma                         | Q9UJV8    | 4.0E-02 |
| QSOX1    | Sulfhydryl oxidase 1                                              | O00391    | 4.6E-02 |
| RAB1C    | Ras-related protein Rab-35                                        | Q92928    | 3.8E-02 |
| REG1B    | Lithostathine-1-beta                                              | P48304    | 2.8E-02 |
| RIOK3    | Serine/threonine-protein kinase RIO3                              | O14730    | 4.5E-02 |
| SERPINB4 | Serpin B4                                                         | P48594    | 3.6E-02 |
| SERPINC1 | Antithrombin-III                                                  | P01008    | 3.0E-02 |
| SLC2A5   | Solute carrier family 2, facilitated glucose transporter member 5 | P22732    | 3.6E-02 |
| SSX7     | Protein SSX7                                                      | Q7RTT5    | 3.7E-02 |
| TSPAN14  | Tetraspanin-14                                                    | Q8NG11    | 4.2E-02 |
| TXNDC17  | Thioredoxin domain-containing protein 17                          | Q9BRA2    | 9.1E-03 |
| WTAP     | Pre-mRNA-splicing regulator WTAP                                  | Q15007    | 2.3E-03 |

**Table S2.** Analytical details of the peptides included in the targeted assay. *The precursor proteins of the peptides are represented as gene names. Amino acid sequences, the transitions of precursor to product ions and the cone and collision energies are presented.*

| Gene     | Amino acid sequence       | Precursor<br>[m/z] | Product #1/2<br>[m/z] | Collision voltage #1/2<br>[V] |
|----------|---------------------------|--------------------|-----------------------|-------------------------------|
| A2M      | AFQPFVVELTMPYSVIR         | 1023.0             | 1079.6/1208.6         | 37/37                         |
| ABCA7    | ADTDMEGSVDTR              | 648.8              | 763.3/894.4           | 22/22                         |
| ABCA7    | LLQDVGLVSK                | 536.3              | 717.4/845.5           | 17/17                         |
| ADIPOQ   | IFYNQNNHYDGSTGK           | 591.3              | 666.3/1106.5          | 20/20                         |
| ANXA2    | TNQELQEINR                | 622.8              | 659.3/772.4           | 22/22                         |
| ANXA2    | TPAQYDASELK               | 611.8              | 825.4/1024.5          | 22/22                         |
| APOA4    | LAPLAEDVR                 | 492.3              | 589.3/799.4           | 17/17                         |
| APOA4    | LLPHANEVSQK               | 412.6              | 456.7/505.3           | 14/14                         |
| APOE     | LGPLVEQGR                 | 484.8              | 588.3/701.4           | 17/17                         |
| APOE     | AATVGSLAGQPLQER           | 749.8              | 642.4/827.6           | 18/26                         |
| APP      | GLTTRPGSGLTNIK            | 472.3              | 572.3/622.9           | 16/16                         |
| B4GT1    | YWLYLHPVLQR               | 551.0              | 612.4/651.4           | 19/19                         |
| BCHE     | YLTNLNTESTR               | 599.3              | 707.3/921.5           | 21/21                         |
| BCHE     | YGNPNETQNNSTSWPVFK        | 1042.0             | 490.3/874.9           | 37/37                         |
| BST1     | SAAAATQR                  | 388.2              | 475.3/617.3           | 13/13                         |
| BST1     | GFFADYEIPNLQK             | 514.6              | 599.4/830.3           | 17/17                         |
| C3       | TVMVNIENPEGIPVK           | 820.4              | 853.5/982.5           | 29/29                         |
| CAPN2    | NFFLTNR                   | 456.2              | 650.4/797.4           | 16/16                         |
| CCL4     | NFVVDDYYETSSLCSQPAVVVFQTK | 894.8              | 889.5/1104.6          | 27/27                         |
| CD5L     | GQWGTVCDDGWDIK            | 818.9              | 1008.4/1107.5         | 29/29                         |
| CDKL5    | FEILGVVGEGAYGVVLK         | 584.0              | 678.4/806.5           | 20/20                         |
| CDKL5    | GTSMCPTLQVR               | 625.3              | 713.4/873.5           | 22/22                         |
| COL4A2   | GLDGYQGPDGPR              | 616.3              | 541.3/726.4           | 22/22                         |
| COL4A2   | SVSIGYLLVK                | 539.8              | 692.4/892.6           | 19/19                         |
| COL6A3   | QLGTVQQVISER              | 679.4              | 859.5/1116.6          | 24/24                         |
| CP       | EDEDQESNK                 | 620.8              | 752.4/867.4           | 22/22                         |
| CP       | DNEDFQESNR                | 627.3              | 633.3/780.4           | 22/22                         |
| CRISPLD1 | AAVHAGVVR                 | 440.3              | 501.4/638.4           | 19/19                         |
| CRISPLD1 | GNWWGHAPYK                | 405.9              | 407.3/478.3           | 18/18                         |
| CSF1R    | VVEATAFGLGK               | 546.3              | 764.4/893.5           | 19/19                         |
| CST3     | ALDFAVGEYNK               | 613.8              | 780.4/927.5           | 22/22                         |
| CYCS     | TGPNLHGLFGR               | 390.2              | 505.8/534.3           | 13/13                         |
| DCXR     | AVIQVSQIVAR               | 592.4              | 772.5/900.5           | 21/21                         |
| DKK3     | SAVEEMEAEAAAK             | 732.8              | 818.4/949.4           | 26/26                         |
| DKK3     | EVPDEYEVGSFMEEVR          | 957.9              | 843.9/1053.5          | 34/34                         |
| DNAH1    | LWYHENCN                  | 393.2              | 449.2/578.3           | 18/18                         |
| DNAH1    | ANLMAAYTGR                | 534.3              | 638.3/769.4           | 18/18                         |
| DNAH12   | MHIFQPEISK                | 410.5              | 529.2/573.3           | 11/11                         |
| DNAH12   | SFIAVPVTNR                | 552.3              | 586.3/756.4           | 14/14                         |
| EFNA5    | VENSLPADDTVHESAEPSR       | 728.0              | 755.8/820.4           | 25/25                         |
| EPO      | TITADTFR                  | 462.7              | 609.3/710.3           | 16/16                         |

|          |                 |       |               |       |
|----------|-----------------|-------|---------------|-------|
| FABP5    | TTQFSTLGEK      | 556.3 | 781.4/909.5   | 20/20 |
| FABP5    | ELGVGIALR       | 464.3 | 529.3/685.4   | 16/16 |
| FGA      | AQLVDMK         | 402.7 | 492.2/605.3   | 14/14 |
| FGA      | GLIDEVNQDFTNR   | 760.9 | 894.4/1237.5  | 27/27 |
| GDA      | YTFPAEHR        | 340.8 | 512.3/609.3   | 14/14 |
| GDA      | FQNIDFAEEVYTR   | 544.6 | 667.3/796.3   | 13/13 |
| GOLM1    | AVLVNNITTGER    | 643.9 | 790.4/904.4   | 23/23 |
| GOLM1    | DTINLLDQR       | 544.3 | 644.4/758.4   | 19/19 |
| GRN      | ENATTDLLTK      | 553.3 | 690.4/791.5   | 19/19 |
| GRN      | AVALSSSVMCPDAR  | 732.4 | 1022.4/1109.5 | 26/26 |
| HPX      | YYCFQGNQFLR     | 748.3 | 862.5/1009.5  | 27/27 |
| HSCB     | LAEAESEAAMK     | 575.3 | 836.4/965.4   | 20/20 |
| HSCB     | LVHPDFFSQR      | 415.9 | 537.3/709.4   | 14/14 |
| HSP90AB1 | SIYYITGESK      | 580.8 | 634.3/797.4   | 20/20 |
| HSPA1L   | VEIANDQGNR      | 614.8 | 703.3/774.3   | 22/22 |
| HSPA5    | ITITNDQNR       | 537.8 | 747.3/860.4   | 19/19 |
| HSPA8    | DAGTIAGLNVLR    | 600.3 | 742.5/855.5   | 21/21 |
| HSPD1    | VTDALNATR       | 480.8 | 645.4/760.4   | 17/17 |
| ICAM1    | ASVSVTAEDEGTQR  | 725.3 | 834.4/1006.4  | 26/26 |
| ICAM1    | LLGIETPLPK      | 540.8 | 797.5/854.5   | 19/19 |
| IGHA2    | TPLTANITK       | 479.8 | 647.3/760.4   | 13/13 |
| IGHA2    | WLQGSQELPR      | 607.3 | 729.4/786.4   | 23/23 |
| IL7      | LNDLCFLK        | 511.8 | 680.4/795.4   | 18/18 |
| ITIH2    | VQFELHYQEVK     | 473.9 | 666.4/803.4   | 16/16 |
| ITIH2    | TEVNVLPGAK      | 514.3 | 698.4/797.5   | 18/18 |
| MASP2    | AGYVLHR         | 408.2 | 425.3/524.3   | 14/14 |
| MASP2    | WPEPVFGR        | 494.3 | 575.3/801.4   | 17/17 |
| MIEN1    | ASNGETLEK       | 474.7 | 676.4/790.4   | 16/16 |
| MIEN1    | EQYPGIEISR      | 660.8 | 900.5/1063.5  | 23/23 |
| MMP3     | TYFFVEDK        | 524.8 | 637.3/784.4   | 18/18 |
| MSN      | EDAVLEYLK       | 540.3 | 552.3/665.4   | 19/19 |
| MYO10    | LYCFLDTDNVPK    | 742.9 | 788.4/901.5   | 26/26 |
| MYO10    | MPDQFDQAVVLNQLR | 592.0 | 643.4/742.5   | 20/20 |
| NCAM1    | LEGQMGEDGNSIK   | 689.3 | 819.4/950.4   | 24/24 |
| NCAM2    | SFNATAER        | 448.2 | 476.2/661.3   | 15/15 |
| NCAM2    | EALNPETIEIK     | 628.8 | 829.4/943.5   | 20/20 |
| NEFL     | YEEEVLSR        | 512.8 | 603.3/732.4   | 18/18 |
| NEFL     | VLEAELLVLR      | 577.9 | 613.4/813.5   | 20/20 |
| NEFM     | FVEEIIETK       | 618.8 | 732.4/990.5   | 22/22 |
| NFKBIZ   | ASGQAVDDFK      | 519.2 | 879.4/694.3   | 18/18 |
| NLRP3    | YLEDLEDVDLK     | 676.3 | 831.4/946.5   | 24/24 |
| NPC2     | LVVEWQLQDDK     | 686.9 | 932.4/1160.6  | 24/24 |
| NRP1     | ATHGGLGLR       | 441.3 | 515.4/572.4   | 19/19 |
| NRP1     | EWIQVDLGLLR     | 447.9 | 458.3/571.4   | 12/12 |
| OLR1     | QQAESEASENELK   | 573.9 | 719.4/848.4   | 19/19 |
| PGAM1    | AMEAVAAQ GK     | 488.3 | 644.4/773.4   | 17/17 |

|                    |                          |        |              |         |
|--------------------|--------------------------|--------|--------------|---------|
| PGK1               | VLPGVDALSNI              | 549.5  | 466.5/885.8  | 8/10    |
| PKM                | ITLDNAYMEK               | 599.3  | 755.3/791.4  | 21/21   |
| PLAU               | SDALQLGLGK               | 501.3  | 615.4/728.5  | 17/17   |
| PLD3               | LLISCWGHSEPSMR           | 558.3  | 667.3/723.8  | 19/19   |
| PLD3               | ALLNVVDNAR               | 542.8  | 574.3/787.4  | 19/19   |
| PPP3CB             | GLTPTGMLPSGVLGGR         | 792.4  | 656.9/813.5  | 28/28   |
| PTGDS              | TMLLQPAGSLGSYSYR         | 872.4  | 989.5/1157.6 | 31/31   |
| PTGDS              | AQGFTEDTIVFLPQTDK        | 955.5  | 363.4/588.6  | 42/26   |
| QSOX1              | LEEIDGFFAR               | 598.8  | 712.3/954.5  | 21/21   |
| QSOX1              | LDVPVWDVEATLNFLK         | 930.0  | 766.4/935.5  | 33/33   |
| REG1B              | ISCPEGTNAYR              | 634.3  | 681.3/907.4  | 22/22   |
| REG1B              | WHWSSGSLVSYK             | 479.6  | 496.3/609.4  | 16/16   |
| RSF1               | EADGGGVGR                | 409.2  | 445.3/502.3  | 18/18   |
| SCRG1              | DVFFGPK                  | 405.2  | 448.2/595.3  | 13/13   |
| SERPINA1           | LSSWVLLMK                | 538.8  | 603.4/876.5  | 19/19   |
| SERPINA3           | LYGSEAFATDFQDSAAAK       | 946.4  | 952.4/1053.5 | 34/34   |
| SERPINF2           | LGNQEPGGQTALK            | 656.8  | 674.4/771.4  | 23/23   |
| SERPINF2           | HQMDLVATLSQLGLQELFQAPDLR | 908.7  | 500.1/1112.8 | 18/18   |
| SERPING1           | LVLLNAIYLSAK             | 659.4  | 765.5/992.6  | 23/23   |
| SIRT2              | YHLPYPEAIFEISYFK         | 673.0  | 786.4/933.4  | 18/18   |
| SIRT2              | VICLVGAGISTSAGIPDFR      | 645.0  | 534.2/704.3  | 17/17   |
| SOD3               | VTGVVLFRR                | 445.8  | 534.3/690.4  | 15/15   |
| SOD3               | AGLAASLAGPHSIVGR         | 492.9  | 582.8/618.3  | 16/16   |
| SPP2               | DALSASVVK                | 445.3  | 503.3/590.4  | 15/15   |
| SPP2               | VNSQSLSPYLFR             | 705.9  | 695.4/782.4  | 25/25   |
| TCHHL1             | GEDVQLTEDQEQLPAR         | 572.3  | 600.3/642.3  | 19/19   |
| TCHHL1             | EISQEGDEPAR              | 615.8  | 644.3/988.4  | 22/22   |
| TFEB               | IQELEMQAR                | 559.3  | 747.4/876.4  | 20/20   |
| TFEB               | EYLSETYGNK               | 602.3  | 798.4/911.4  | 20/20   |
| TNFβ               | MHLAHSTLKPAAHLIGDPSK     | 531.8  | 331.2/619.4  | 18/18   |
| TNNT3              | DLMELQALIDSHFEAR         | 630.0  | 764.9/830.4  | 21/21   |
| TOLLIP             | LNITVVQAK                | 493.3  | 645.4/758.5  | 17/17   |
| TOLLIP             | GPVYIGELPQDFLR           | 802.4  | 775.4/1074.6 | 29/29   |
| TUBA4A             | AVFVDLEPTVIDEIR          | 858.5  | 942.5/1299.7 | 31/31   |
| TXN                | LEATINELV                | 501.2  | 474.1/528.2  | 9/9     |
| UBC                | TITLEVEPSDTIENVK         | 894.5  | 905.5/1002.5 | 32/32   |
| UHRF1BP1L          | DCNVIATK                 | 460.7  | 531.4/645.4  | 16/16   |
| VCAM1              | NTVISVNPSTK              | 580.3  | 732.4/944.5  | 20/20   |
| VCAM1              | LHIDEMDSVPTVR            | 756.6  | 251.2/472.4  | 28/24   |
| RSF1               | DISTITGHR                | 333.8  | 470.3/583.4  | 14/14   |
| Internal standards |                          |        |              |         |
| ALDOA              | ALQASALK                 | 404.8  | 496.3/624.4  | 14 / 14 |
| RSU1               | ALYLSDNDFEILPPDIGK       | 1014.3 | 633.4/746.4  | 36 / 36 |
| C3                 | SSLSVPYVIVPLK            | 704.4  | 357.3/934.6  | 25 / 25 |
| ENO1 (yeast)       | GNPTVEVELTTEK            | 709.1  | 623.5/948.7  | 18 / 20 |
| GSTO1              | GSAPPGPVPEGSIR           | 664.4  | 556.8/1015.6 | 23 / 23 |
